# Supplementary material
Source: PubMed Central journal article supplement (PMC2867789)
Supplement: NIHMS30238-supplement-1.pdf [file NIHMS30238-supplement-1.pdf]

# The Plant Microtubule-Associated Protein AtMAP65-3/PLE Is Essential for Cytokinetic Phragmoplast Function

Sabine Müller, Andrei Smertenko, Vera Wagner,  
Maria Heinrich, Patrick J. Hussey,  
and Marie-Theres Hauser

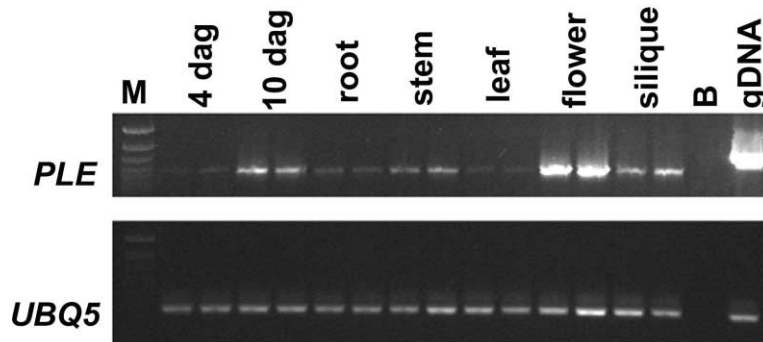

Figure S1. Expression of *AtMAP65-3/PLE* RT-PCR of cDNA from indicated wild-type seedlings and organs. Genomic DNA (gDNA) was used as a control. An *AtMAP65-3/PLE*-specific fragment is detectable in all organs analyzed. (B) no template control. UBQ5 (ubiquitin extension protein 5) was used as the loading control. M, markers.

Table S1. Molecular Markers and Primers Used for Cloning the *PLE* Gene and Analyzing Its Expression

| Marker Size            | Type Polymorphism | Distance to <i>PLE</i> [cM] | Primer Sequences 5'-3'                                                 |
|------------------------|-------------------|-----------------------------|------------------------------------------------------------------------|
| CIC7B9R<br>550 bp      | CAPS (HindIII)    | 1.37 ± 0.3                  | F: 5'-ATCACTTCGTCACCTTTGATGAG<br>R: 5'-GTATTACTACTACCTCCTGTT TG        |
| CIC6A5L<br>240 bp      | DA                | 1.15 ± 0.3                  | F: 5'-GCCAATACAACAATCAAATCTTCTCAAC<br>R: 5'-CAACTGCAATTCTCATGGAGAAGCC  |
| KG8sp<br>428 bp        | DA                | 0.57 ± 0.2                  | F: 5'-GGGCCCTTCTTCCATCTTTG T<br>R: 5'-CTTCGGAGCCGTTTAGTCTT CAC         |
| mio24<br>498 bp        | RFLP (EcoRV)      | 0.04 ± 0.01                 | F: 5'-AACGGATGAGTAGAAACCTGAACG-3'<br>R: 5'-ATTGAAACCGCTACGCCGAC TC-3'  |
| CIC4G5L<br>454 bp      | DA                | 1.9 ± 0.4                   | F: 5'-GGCTTCCATGATGTGATTTGG-3'<br>R: 5'-ACCGCATTTGTTCTTCTC CTG-3'      |
| mfg13not<br>300 bp     | DA                | 0.57 ± 0.2                  | F: 5' ATGGAACCAGAAGATACTCGTGC-3'<br>R: 5' AACTACTTCACCTTCAGCGTCATG-3'  |
| F12A17sp<br>413 bp     | DA                | 0                           | F: 5'-GTTTCAGCTCTGTCTCCTCTCAAT-3'<br>R: 5'-GATCATCTGCAAACCATAAACAAG-3' |
| K17N15/49<br>597 bp    | CAPS (Ddel)       | 0.13 ± 0.1                  | F: 5'-GTACGCAAGGCAATGAACGAAATC-3'<br>R: 5'-TACTAGCGGCCGCTCCATCATA-3'   |
| Mioph2c<br>471 bp      | DA                | 0.08 ± 0.02                 | F: 5'-TGGTGCGAGTTCTTTTGTGATTA-3'<br>R: 5'-GTTTTAGATACCTGTCCCCTGTC-3'   |
| Expression Analysis    | cDNA<br>bp        | gDNA<br>bp                  |                                                                        |
| <i>PLE</i> splicing    | 481               | 711                         | F: 5'-CCCAATCTCATCATCATCTC-3'<br>R: 5'-TCTAAGCTGAGCTCTACATCGA-3'       |
| <i>PLE</i> expression  | 1109              | 1722                        | F: 5'-ATGTCGGTGATCTGCTTTCTTTGTTAG-3'<br>R: 5'-AGAGTTACACTGCCAGCTGCA-3' |
| <i>UBQ5</i> expression | 426               | 426                         | F: 5'-GGTGCTAAGAAGAGGAAGAAT-3'<br>R: 5'-CTCCTTCTTCTGGTAAACGT-3'        |

The markers are indicated with CAPS for cleaved amplified polymorphism, DA for duplex analysis markers, and RFLP for restriction fragment length polymorphism marker.
